# Supplementary material for: In Vivo Silencing of Genes Coding for dTip60 Chromatin Remodeling Complex Subunits Affects Polytene Chromosome Organization and Proper Development in Drosophila melanogaster
Source: MDPI journal article supplement (doi:10.3390/ijms22094525), 2021-04-26
Supplement: s1 [file s1]

## Supplementary materials

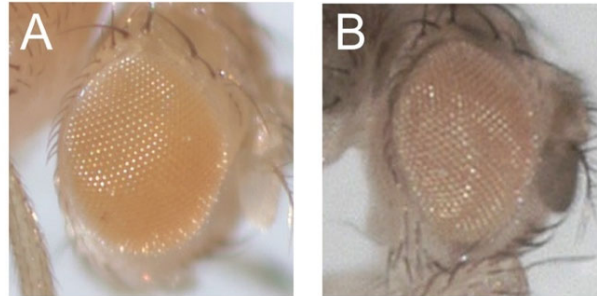

**Figure S1.** Eye color of *Bap55<sup>EY1596</sup> Eaf6<sup>d06605</sup>*. Light-yellow eye color of A) *Bap55<sup>EY1596</sup>* and B) *Eaf6<sup>d06605</sup>* heterozygous mutations.

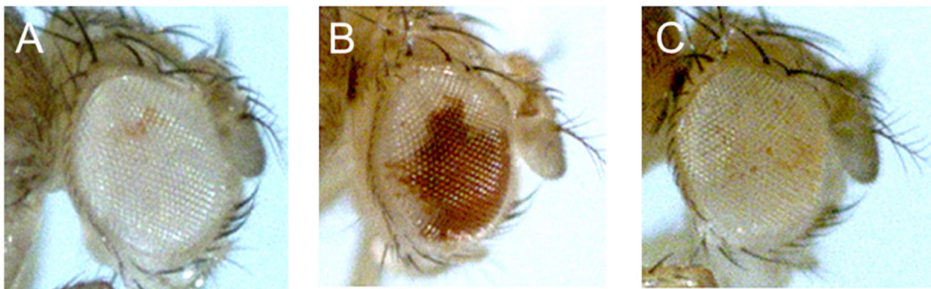

**Figure S2.** The 7m27 variegated phenotype. (A) Variegated phenotype of 7m27; (B) one copy of *Su(var)205* suppresses 7m27; (C) One copy of *Dom3* allele does not suppress the variegated phenotype of 7m27.

Table S1. Primer Sequences Used for Reverse Transcription-Polymerase Chain Reaction (PCR)

| <b>Gene</b>   | <b>Forward primer</b> | <b>Reverse primer</b> |
|---------------|-----------------------|-----------------------|
| <i>domino</i> | GACGGCGCTAGCTAAGGAAT  | CCGCATCTTCGCTTTCTTCG  |
| <i>pontin</i> | AAACCGAGGAGTATGTGCCG  | CCATGTCGGCAGTGGAGTAG  |
| <i>reptin</i> | GGAGATGAGCAAGACCGAGG  | ATCTCTCCAGTATCGCCGGA  |
| <i>Tip60</i>  | GCGGCTTCCACATAGTAGGG  | CGGCAATGAAGCACAATCTCT |
| <i>E(Pc)</i>  | CCGTTACACACTGACCTCCC  | TGGCGAAGATCAGCACAACT  |
| <i>Yeti</i>   | TATACGGAGGGAAACGCAGC  | TCGACGTTGGTTAAGCCGTT  |
| <i>YL-1</i>   | GTGGAGGACTACATGCCAC   | TATGGCTGCTGTGTGATCGG  |
| <i>Eaf6</i>   | GTTGGCGGACCTCATCAAGA  | ACACCATTCCGCTCACTACG  |
| <i>DMAPI</i>  | GATACCGCTCTGGGAATCGG  | TCTCCTCCTCCACCTGTTGT  |
| <i>Mrg15</i>  | ACCGCCAACTCTACAACCAG  | TGCGCCAAATACTGCTCAGA  |
| <i>Gas41</i>  | ACGAGATTACCGAGACCGGA  | ACCTTCGCCAATTCTGCCTT  |
| <i>Rpl32</i>  | GCCCAAGGGTATCGACAACA  | CTTGCGCTTCTTGGAGGAGA  |
